# Supplementary material
Source: PubMed Central journal article supplement (PMC5004651)
Supplement: ASN.2015060703_ASN2015060703SupplementaryData.pdf [file ASN.2015060703_ASN2015060703SupplementaryData.pdf]

# SUPPLEMENTARY FIGURE 1

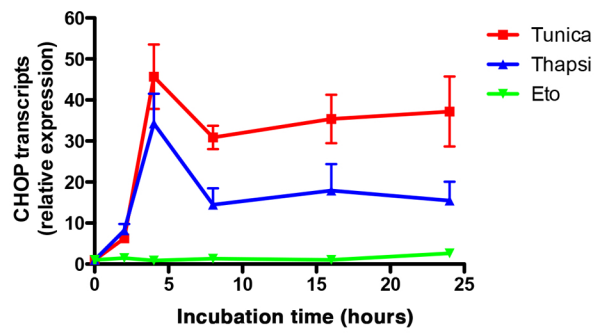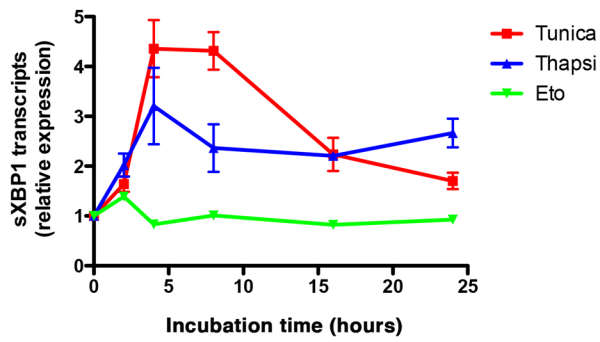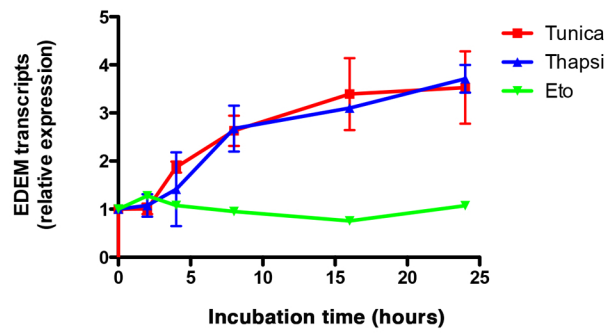

SUPPLEMENTARY FIGURE 2

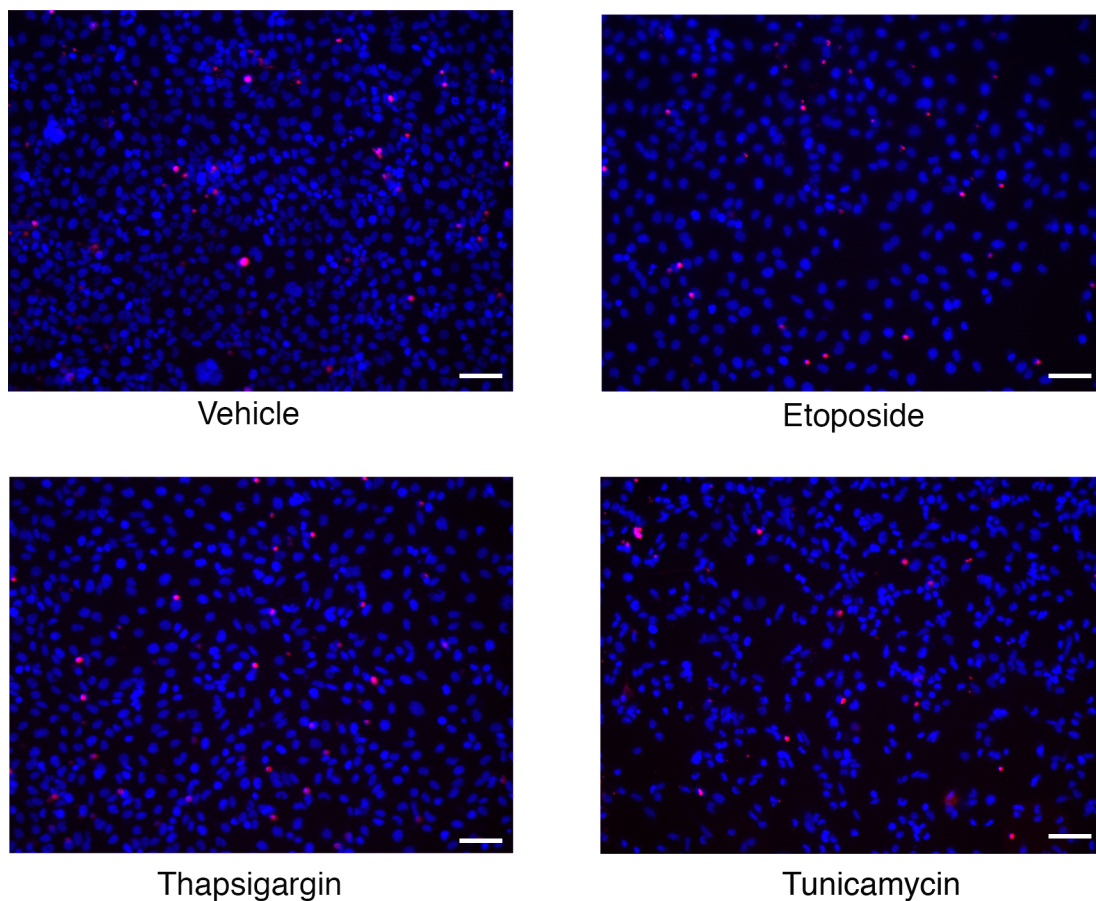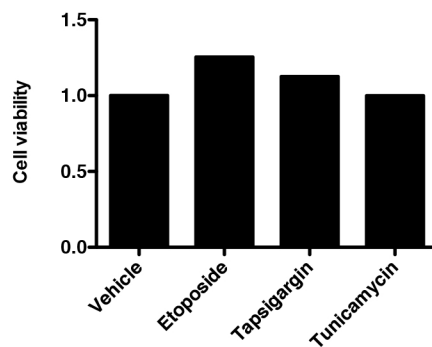

SUPPLEMENTARY FIGURE 3

sXBP1

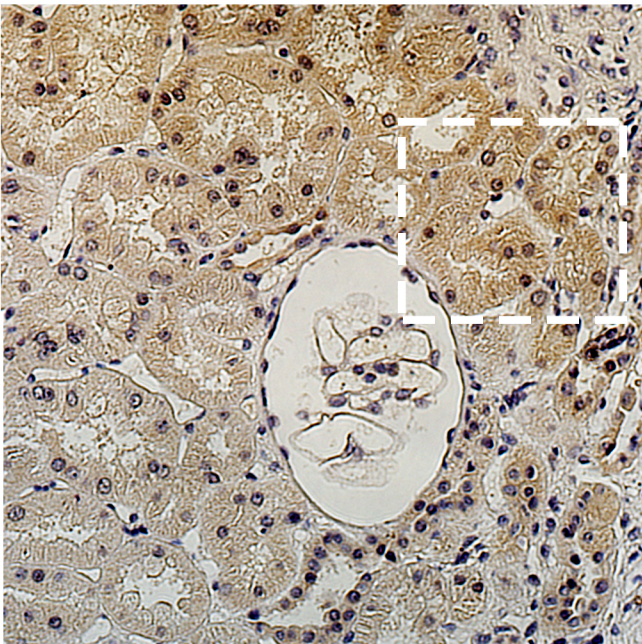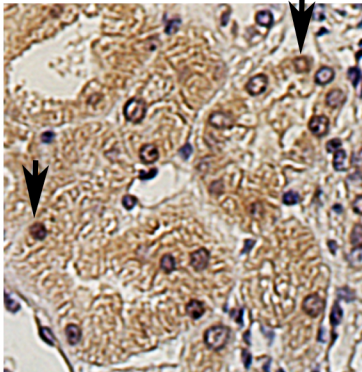

ANG

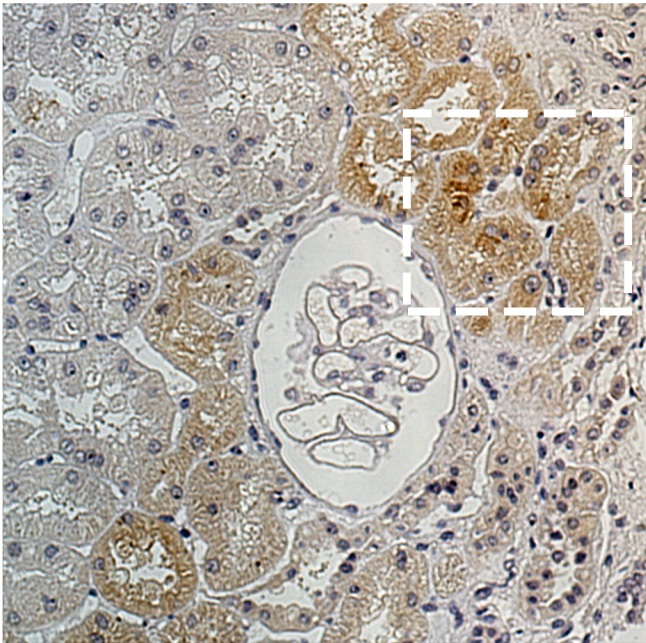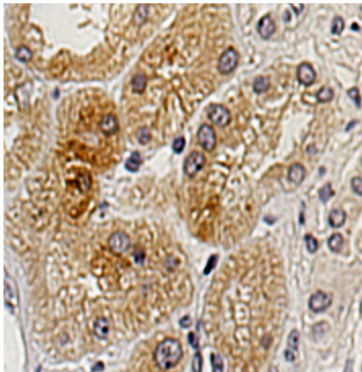

## Supplementary figure legends

### Supplementary figure 1

Box and whiskers plots representing CHOP, sXBP1 and EDEM transcripts relative expression analyzed by RT-qPCR in HREC incubated with 2.5  $\mu\text{g/mL}$  Tunicamycin, 0.25 $\mu\text{M}$  Thapsigargin or vehicle, for a various periods of time. Data are from 3 independent experiments.

### Supplementary figure 2

**A.** Representative epifluorescence photomicrograph of HREC incubated 8 hours with 2.5  $\mu\text{g/mL}$  Tunicamycin, 0.25  $\mu\text{M}$  thasigargin, 100 $\mu\text{M}$  etoposide or vehicle, and stained with 1  $\mu\text{g/ml}$  Hoechst 33342 (HO) and 5  $\mu\text{g/ml}$  propidium iodine (PI). The bar represents 50  $\mu\text{m}$ . The data represent three independent experiments. **B.** Cell viability was determined using the MTS assay 8 hours after incubation with 2.5  $\mu\text{g/mL}$  Tunicamycin, 0.25  $\mu\text{M}$  Thasigargin, 100 $\mu\text{M}$  Etoposide. Values are ratio of cell viability reported to vehicle-treated cells.

### Supplementary figure 3

Representative photomicrograph of sXBP1 and ANG expression evaluated by immunohistochemistry on consecutive slices in kidney allograft biopsy. Original magnification, x40. Black arrows denote sXBP1 positive epithelial cells nuclei, and blue arrow denotes a sXBP1 negative nuclei.

## Supplementary methods

### Cell culture

HREC (HK-2) cells were established by transduction with human papilloma virus (HPV 16) E6/E7 genes from a primary proximal tubule cells culture from normal adult human renal cortex exposed to a recombinant retrovirus containing the HPV 16 E6/E7 genes. HK-2 cells are cultured in Dulbecco's Modified Eagle Medium (DMEM) containing 5 µg/mL insulin, 10 µg/mL human apotransferrin, 500 ng/mL hydrocortisone, 10 ng/mL Epithelial growth factor, 6.5 ng/mL triiodothyronin, 5 ng/mL sodium selenite, 1% fetal calf serum, 25 IU/mL penicillin, 25 µg/mL streptomycin and 10 mM HEPES buffer. These cells lines are Mycoplasma free (Mycoalert Mycoplasma Detection Kit, Lonza). Tunicamycin, thapsigargin and etoposide were from Sigma Aldrich.

### Hoechst Propidium iodine staining

Epifluorescence microscopy was performed on unfixed/unpermeabilized adherent cells stained with Hoechst 33342 (Invitrogen) and propidium iodide (Invitrogen) as previously described (44). Briefly, the cells were grown to confluence on 6-well polycarbonate culture plates. Hoechst 33342 (1 µg/ml) was added for 10 min at 37°C. Propidium iodide was added at a final concentration of 5 µg/ml immediately prior to the fluorescence microscopy analysis (excitation filter I = 360-425 nm).

### Immunofluorescence analysis

For confocal microscopy, the cells were fixed in 2% paraformaldehyde for 1 hour on ice and permeabilized with 0.1% Triton X-100 in PBS for 1 hour. Prior to overnight incubation with 1/50 anti ANG (sc-9044, Santa Cruz Biotechnology), the slides were blocked for 1 hour in a solution comprising 2% goat serum (Sigma Aldrich), 1% bovine serum albumin (Sigma Aldrich), and 0.1% Tween-20 in PBS. Alexa Fluor 555<sup>®</sup> donkey anti-rabbit IgG (Invitrogen) were used as secondary antibodies. The nuclear counterstain used for visualization was 4',6-diamidino-2-phenylindole (DAPI, 0.05 µg/ml) (Invitrogen, D3571). AlexaFluor<sup>®</sup> 555 and DAPI were imaged using a Zeiss LSM 710 imaging fluorescence microscope.

### Chromatin immunoprecipitation assay

Briefly, HREC were incubated with Tunicamycin for 1 hour. Subsequently, the cells were washed with PBS and cross-linked with 1% formaldehyde at 37°C. After terminating the crosslinking reaction, the cells were collected, washed, and resuspended in the SDS lysis buffer containing protease inhibitor cocktail (Roche). The lysates were sonicated five times followed by cooling on ice. The cell debris was cleared, and the supernatant was diluted in a ChIP dilution buffer. After a brief centrifugation, 1% of the total supernatant was put aside and one-tenth of this material was used as input control. Half of the remaining supernatant was incubated with anti-sXBP1 or anti-p65 antibody, and the other half of the supernatant was incubated with a non-immune rabbit immunoglobulin G and protein G magnetic beads at 4°C overnight with rotation. The beads were washed and pelleted using a magnetic separator. After elution, DNA fragments were purified using a spin column. For PCR reactions, 10% of the immunoprecipitated materials were used as the DNA template in 40 cycles of amplification using the following primer sets. The primers sequences are listed in the **Supplementary table 1A**. The results of the ChIP analysis were calculated and recorded as fold-enrichment values. The default Input fraction was 1%, which represents a dilution factor of 100 or 6.644 cycles (i.e., log<sub>2</sub> of 100).

### **RNA isolation from kidney transplant biopsies**

Total RNA was extracted using TriPure Isolation<sup>®</sup> reagent (Roche Applied Science). The expression levels ANG mRNA were quantified through RT-qPCR. The fold-changes were normalized to the RPL13A housekeeping gene and compared with the results obtained from a normal kidney.

### **Clinical chemistry analyses**

The urine protein measurements were performed at the Clinical Chemistry Department of the European Georges Pompidou Hospital. The urinary total protein concentration was quantified by measuring pyrogallol red at 600/800 nm absorbance (urinary CSF protein assay, Beckman Coulter), and the Albumin concentration was measured by immunoturbidimetry analysis (DIAGAM assay, Beckman Coulter) using a Beckman Coulter AU680 analyzer. The urinary levels of RBP were measured using a Siemens BN II nephelometer Analyzer II and kits from Siemens. The urine protein concentrations were corrected for creatinin levels, which were measured using a colorimetric assay (modified kinetic Jaffe method) on a Beckman Coulter AU680 analyzer (urine).

### **Viability studies**

HRECs were seeded in 96-well plates ( $10^4$  cells/ml). Twenty-four hours later, cells were treated. Three days afterwards, the relative number of living cells per well was determined on the basis of mitochondrial integrity by assay with 3-(4,5-dimethylthiazol-2-yl)-5-(3-carboxymethoxyphenyl)-2-(4-sul-fophenyl)-2H-tetrazolium (MTS) (Promega, Charbonnieres, France), according to the manufacturer's instructions.

**Supplementary table 1A.** Primer sequences used for RT-PCR analysis

| Gene name                         | Primer sequensce                                                  |
|-----------------------------------|-------------------------------------------------------------------|
| ANG                               | F 5'-tgtcctgccggttctgcgg-3'<br>R 5'-ccggccctgtggttggcat-3'        |
| GRP78/BiP                         | F 5'-ggtgaaagaccctgacaaa-3'<br>R 5'-gtcaggcgattctggtcatt-3'       |
| IL-6                              | F 5'-aggagactgcctggtgaaa-3'<br>R 5'-ggatgcagggtcaagagtagtg-3'     |
| IL-8                              | F 5'-caggaattgaatgggttgc-3'<br>R 5'-aaaccaaggcacagtggaac-3'       |
| TNF $\alpha$                      | F 5'-tcctcagacaccctcaacc-3'<br>R 5'-cagggatcaaagctgtaggc-3'       |
| IDO                               | F 5'-ggcacacgctatggaaaact-3'<br>R 5'-cgctgtgactgtggctctgt-3'      |
| INF $\alpha$                      | F 5'-acctagagccaaggtca-3'<br>R 5'-cccagagagcagcttgact-3'          |
| INF $\beta$                       | F 5'-cattacctgaaggccaagga-3'<br>R 5'-cagcatctgctggtgaaga-3'       |
| IL1 $\beta$                       | F 5'-cagccaatcttcattgctca-3'<br>R 5'-gcatcttctcagctgtcc-3'        |
| iNOS                              | F 5'-aagccccacagtgaagaaca-3'<br>F 5'-tccaaggacaggccatctct-3'      |
| sXBP1                             | F 5'-tgctgagtcgcagcaggtg-3'<br>F 5'-gctggcaggctctggggaag-3'       |
| ANG promoter primer 1 (XBP1 CHIP) | F 5'- acaaaagggggtggaaaaac -3'<br>R 5'- agctacagtggtcgttgg -3'    |
| ANG promoter primer 2 (XBP1 CHIP) | F 5'- cagagactaccctggctga-3'<br>R 5'- gttttccacccccctttgt-3'      |
| ANG promoter primer 1 (p65 CHIP)  | F 5'- acaaaagggggtggaaaaac -3'<br>R 5'- agctacagtggtcgttgg -3'    |
| ANG promoter primer 2 (p65 CHIP)  | F 5'- tgtgtacacggacggagatg-3'<br>R 5' atcccaggctcgttctttg -3'     |
| IL6 promoter (p65 CHIP)           | F 5'-tagagcttctttcgttcccgg-3'<br>R 5'-tgtgtcttgcgatgctaaaggacg-3' |

**Supplementary table 1B.** Primary antibodies used for Western blot.

| <b>Antibody</b>                      | <b>Dilution</b> | <b>Reference</b>     |
|--------------------------------------|-----------------|----------------------|
| <b>Anti-<math>\beta</math> Actin</b> | 1:1000          | A2668 <sup>1</sup>   |
| <b>Anti-ATF6</b>                     | 1 :500          | IMG-273 <sup>2</sup> |
| <b>Anti-IRE1<math>\alpha</math></b>  | 1:500           | 3294 <sup>4</sup>    |
| <b>Anti-PERK</b>                     | 1:500           | 3192 <sup>4</sup>    |
| <b>Anti-XBP1</b>                     | 1 :1000         | 37152 <sup>4</sup>   |
| <b>Anti I<math>\kappa</math>B</b>    | 1 :1000         | 9542 <sup>4</sup>    |
| <b>Anti phospho JNK</b>              | 1 :1000         | 9251 <sup>4</sup>    |
| <b>Anti JNK</b>                      | 1 :1000         | 3708 <sup>4</sup>    |
| <b>Anti phosphoERK</b>               | 1 :1000         | 4376 <sup>4</sup>    |
| <b>Anti ERK</b>                      | 1 :1000         | 4372 <sup>4</sup>    |
| <b>Anti phosphoAkt</b>               | 1 :1000         | 8200 <sup>4</sup>    |
| <b>Anti Akt</b>                      | 1 :1000         | 9272 <sup>4</sup>    |
| <b>Anti P65</b>                      | 1 :1000         | SC-8008 <sup>5</sup> |
| <b>Anti phosphoMEK</b>               | 1 :1000         | 9121 <sup>4</sup>    |
| <b>Anti PhosphoP70S6Kinase</b>       | 1 :1000         | 9205 <sup>4</sup>    |

<sup>1</sup> Sigma-Aldrich

<sup>2</sup> Imgenex

<sup>3</sup> Abcam

<sup>4</sup> Cell Signaling Technology

<sup>5</sup> Santa Cruz Biotechnology
